# Supplementary material
Source: PubMed Central journal article supplement (PMC8629769)
Supplement: mmc1.pdf [file mmc1.pdf]

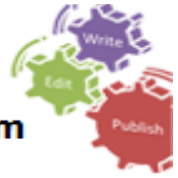

## EDITORIAL CERTIFICATE LETTER

---

This document is to certify that the manuscript listed below was edited for proper English language, grammar, punctuation, spelling, and overall style by one of the highly qualified subject-expert native English speaking editors at **NativeEnglishEdit.com**

The substantive content of the article mentioned below remains the full responsibility of the author/authors:

TITLE OF ARTICLE:

CHARACTERISTICS OF COVID-19 IN PATIENTS WITH MULTIPLE SCLEROSIS

AUTHOR(S):

FERESHTEH GHADIRI, MOHAMMAD ALI SAHRAIAN, VAHID SHAYEGANNEJAD, FERESHTEH ASHTARI, HAMIDREZA GHALYANCHI, SEYED MOHAMMAD BAGHBANIAN, HOSSEIN MOJDEHIPANAH, NASTARAN MAJDI-NASAB, SAMANEH HOSSEINI, MARYAM POURSADDEGHFARD, NAHID BELADIMOGHADAM, NAZANIN RAZAZIAN, SAEIDEH AYOUBI, NASIM REZAEIMANESH, SHARAREH ESKANDARIEH, ABDORREZA NASER MOGHADASI.

REFER CODE:

EE-2021-77775024-MOGHADASI-1999-MED

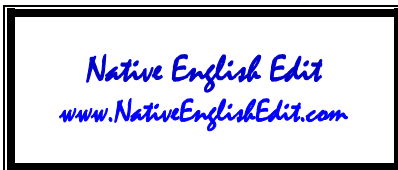

---

Documents receiving this certification should be English-ready for publication; however, the author has the ability to accept or reject our suggestions and changes.

This certificate may be verified at:

[www.NativeEnglishEdit.com](http://www.NativeEnglishEdit.com)

London

East End Road 27, N 3 3QT

United Kingdom
